# Supplementary material
Source: Elsevier journal article supplement (https://comptes-rendus.academie-sciences.fr/chimie/article/10.1016/j.crci.2010.06.011/file/attach/mmc1.pdf)

## Electronic Supplementary Material

### Electronic Structure and Properties of Some Oligomers Based on Fluorinated 1*H*-Phospholes: *n*- vs. *p*-type Materials.

**Nguyen-Nguyen Pham-Tran,<sup>1</sup> and Minh Tho Nguyen<sup>2,\*</sup>**

<sup>1</sup> Faculty of Chemistry, College of Natural Sciences, University of HoChiMinh City, Vietnam.

<sup>2</sup> Department of Chemistry, Katholieke Universiteit Leuven, B-3001 Leuven, Belgium

<sup>3</sup> Institute for Computational Science and Technology, HoChiMinh City, Thu Duc, HoChiMinh City, Vietnam.

(Received 15 January 2010)

**Table 1S:** Total energies of neutral (E), cation (E+) and anion ( E-) form of Oligomers at B3LYP/SVP. Energy values are given in au.

| Structures         | E              | E+             | E-             |
|--------------------|----------------|----------------|----------------|
| 6T                 | -90064.11906   | -90058.293429  | -90065.407668  |
| PF-6T              | -127825.365228 | -127818.949632 | -127827.255235 |
| FTTTTF             | -3660.888215   | -3660.655863   | -3660.952194   |
| TFTTFT             | -94189.319040  | -94182.936601  | -94190.902936  |
| 6-1 <i>H</i> -P    | -80881.846478  | -80876.264694  | -80883.805225  |
| 6-1 <i>F</i> -P    | -97069.84028   | -97063.92675   | -97072.63128   |
| PF-6P              | -134832.955097 | -134826.461311 | -134835.998905 |
| 1 <i>H</i> -FPPPPF | -3435.942742   | -3435.717139   | -3436.025461   |
| 1 <i>H</i> -PFPPFP | -3832.65211    | -3832.418021   | -3832.758722   |
| 1 <i>F</i> -FPPPPF | -88067.85982   | -88061.62243   | -88069.81276   |
| 1 <i>F</i> -PFPPFP | -98859.63971   | -98853.16937   | -98862.16104   |

**X, Y, Z coordinates at B3LYP/SVP.**

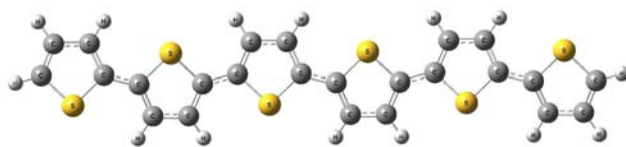

1. 6T

|   |          |         |         |
|---|----------|---------|---------|
| C | 11.0537  | 0.1256  | -0.1081 |
| C | 10.5335  | 1.3962  | -0.0750 |
| C | 9.1098   | 1.4065  | -0.0402 |
| C | 8.5487   | 0.1401  | -0.0469 |
| S | 9.8098   | -1.0767 | -0.0973 |
| C | 7.1497   | -0.2386 | -0.0199 |
| S | 5.8930   | 0.9817  | 0.0122  |
| C | 4.6195   | -0.2236 | 0.0338  |
| C | 5.1693   | -1.4961 | 0.0155  |
| C | 6.5854   | -1.5038 | -0.0157 |
| C | 3.2289   | 0.1698  | 0.0647  |
| S | 1.9545   | -1.0331 | 0.0162  |
| C | 0.6978   | 0.1872  | 0.0921  |
| C | 1.2651   | 1.4519  | 0.1437  |
| C | 2.6804   | 1.4421  | 0.1283  |
| C | -0.6978  | -0.1872 | 0.0921  |
| S | -1.9545  | 1.0331  | 0.0162  |
| C | -3.2289  | -0.1698 | 0.0647  |
| C | -2.6804  | -1.4421 | 0.1283  |
| C | -1.2651  | -1.4519 | 0.1437  |
| C | -4.6195  | 0.2236  | 0.0338  |
| C | -5.1693  | 1.4961  | 0.0155  |
| C | -6.5854  | 1.5038  | -0.0157 |
| C | -7.1497  | 0.2386  | -0.0199 |
| S | -5.8930  | -0.9817 | 0.0122  |
| H | -0.6694  | -2.3665 | 0.1993  |
| H | 0.6694   | 2.3665  | 0.1993  |
| H | -3.2897  | -2.3484 | 0.1683  |
| H | 3.2897   | 2.3484  | 0.1683  |
| H | -4.5620  | 2.4046  | 0.0262  |
| H | 4.5620   | -2.4046 | 0.0262  |
| H | -7.1825  | 2.4190  | -0.0321 |
| H | 7.1825   | -2.4190 | -0.0321 |
| H | 12.1013  | -0.1768 | -0.1383 |
| H | 11.1488  | 2.2994  | -0.0755 |
| H | 8.5111   | 2.3206  | -0.0105 |
| C | -8.5487  | -0.1401 | -0.0469 |
| C | -9.1098  | -1.4065 | -0.0402 |
| C | -10.5335 | -1.3962 | -0.0750 |
| S | -9.8098  | 1.0767  | -0.0973 |
| C | -11.0537 | -0.1256 | -0.1081 |
| H | -8.5111  | -2.3206 | -0.0105 |
| H | -11.1488 | -2.2994 | -0.0755 |
| H | -12.1013 | 0.1768  | -0.1383 |

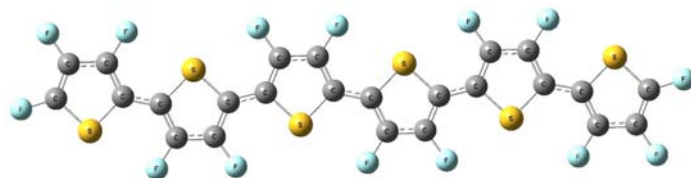

## 2. PF-6T

|    |   |          |         |        |
|----|---|----------|---------|--------|
| 1  | C | -11.0836 | -0.1684 | 0.0000 |
| 2  | C | -10.6144 | 1.1165  | 0.0000 |
| 3  | C | -9.1898  | 1.1478  | 0.0000 |
| 4  | C | -8.5829  | -0.0896 | 0.0000 |
| 5  | S | -9.8120  | -1.3582 | 0.0000 |
| 6  | C | -7.1719  | -0.3888 | 0.0000 |
| 7  | C | -6.5715  | -1.6320 | 0.0000 |
| 8  | C | -5.1585  | -1.5908 | 0.0000 |
| 9  | C | -4.6319  | -0.3133 | 0.0000 |
| 10 | S | -5.9396  | 0.8629  | 0.0000 |
| 11 | C | -3.2444  | 0.0704  | 0.0000 |
| 12 | S | -1.9372  | -1.1047 | 0.0000 |
| 13 | C | -0.7040  | 0.1484  | 0.0000 |
| 14 | C | -1.3069  | 1.3926  | 0.0000 |
| 15 | C | -2.7188  | 1.3491  | 0.0000 |
| 16 | C | 0.7040   | -0.1484 | 0.0000 |
| 17 | S | 1.9372   | 1.1047  | 0.0000 |
| 18 | C | 3.2444   | -0.0704 | 0.0000 |
| 19 | C | 2.7188   | -1.3491 | 0.0000 |
| 20 | C | 1.3069   | -1.3926 | 0.0000 |
| 21 | C | 4.6319   | 0.3133  | 0.0000 |
| 22 | S | 5.9396   | -0.8629 | 0.0000 |
| 23 | C | 7.1719   | 0.3888  | 0.0000 |
| 24 | C | 6.5715   | 1.6320  | 0.0000 |
| 25 | C | 5.1585   | 1.5908  | 0.0000 |
| 26 | C | 8.5829   | 0.0896  | 0.0000 |
| 27 | C | 9.1898   | -1.1478 | 0.0000 |
| 28 | C | 10.6144  | -1.1165 | 0.0000 |
| 29 | C | 11.0836  | 0.1684  | 0.0000 |
| 30 | S | 9.8120   | 1.3582  | 0.0000 |
| 31 | F | -12.3489 | -0.5487 | 0.0000 |
| 32 | F | -11.3655 | 2.2100  | 0.0000 |
| 33 | F | -8.5150  | 2.2956  | 0.0000 |
| 34 | F | -7.2522  | -2.7791 | 0.0000 |
| 35 | F | -4.4153  | -2.6963 | 0.0000 |
| 36 | F | -3.4645  | 2.4531  | 0.0000 |
| 37 | F | -0.6295  | 2.5400  | 0.0000 |
| 38 | F | 0.6295   | -2.5400 | 0.0000 |
| 39 | F | 3.4645   | -2.4531 | 0.0000 |
| 40 | F | 4.4153   | 2.6963  | 0.0000 |
| 41 | F | 7.2522   | 2.7791  | 0.0000 |
| 42 | F | 8.5150   | -2.2956 | 0.0000 |
| 43 | F | 11.3655  | -2.2100 | 0.0000 |
| 44 | F | 12.3489  | 0.5487  | 0.0000 |

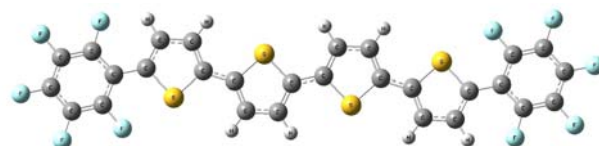

### 3. FTTFTF

|    |   |          |         |         |
|----|---|----------|---------|---------|
| 1  | C | -7.1299  | 0.4809  | -0.1877 |
| 2  | C | -6.5110  | 1.6795  | -0.5157 |
| 3  | C | -5.0999  | 1.6158  | -0.5021 |
| 4  | C | -4.6047  | 0.3681  | -0.1565 |
| 5  | S | -5.9144  | -0.7437 | 0.1437  |
| 6  | C | -3.2284  | -0.0630 | -0.0445 |
| 7  | C | -2.7275  | -1.3287 | 0.2170  |
| 8  | C | -1.3150  | -1.3838 | 0.2531  |
| 9  | C | -0.7042  | -0.1607 | 0.0201  |
| 10 | S | -1.9142  | 1.0774  | -0.2448 |
| 11 | C | 0.7042   | 0.1607  | -0.0201 |
| 12 | S | 1.9142   | -1.0774 | 0.2448  |
| 13 | C | 3.2284   | 0.0630  | 0.0445  |
| 14 | C | 2.7275   | 1.3287  | -0.2170 |
| 15 | C | 1.3150   | 1.3838  | -0.2531 |
| 16 | C | 4.6047   | -0.3681 | 0.1565  |
| 17 | S | 5.9144   | 0.7437  | -0.1437 |
| 18 | C | 7.1299   | -0.4809 | 0.1877  |
| 19 | C | 6.5110   | -1.6795 | 0.5157  |
| 20 | C | 5.0999   | -1.6158 | 0.5021  |
| 21 | C | 8.5652   | -0.2019 | 0.0830  |
| 22 | H | 3.3682   | 2.1978  | -0.3737 |
| 23 | H | 4.4592   | -2.4640 | 0.7477  |
| 24 | H | 0.7530   | 2.2995  | -0.4432 |
| 25 | H | 7.0616   | -2.5820 | 0.7684  |
| 26 | H | -0.7530  | -2.2995 | 0.4432  |
| 27 | H | -3.3682  | -2.1978 | 0.3737  |
| 28 | H | -4.4592  | 2.4640  | -0.7477 |
| 29 | H | -7.0616  | 2.5820  | -0.7684 |
| 30 | C | -8.5652  | 0.2019  | -0.0830 |
| 31 | C | 9.5252   | -1.2345 | -0.0149 |
| 32 | C | 10.8945  | -0.9847 | -0.1041 |
| 33 | C | 11.3689  | 0.3284  | -0.1110 |
| 34 | C | 10.4552  | 1.3796  | -0.0252 |
| 35 | C | 9.0907   | 1.1082  | 0.0707  |
| 36 | F | 9.1499   | -2.5159 | -0.0320 |
| 37 | F | 11.7503  | -1.9976 | -0.1936 |
| 38 | F | 12.6699  | 0.5723  | -0.1992 |
| 39 | F | 10.8856  | 2.6368  | -0.0295 |
| 40 | F | 8.2693   | 2.1585  | 0.1505  |
| 41 | C | -9.0907  | -1.1082 | -0.0707 |
| 42 | C | -10.4552 | -1.3796 | 0.0252  |
| 43 | C | -11.3689 | -0.3284 | 0.1110  |
| 44 | C | -10.8945 | 0.9847  | 0.1041  |
| 45 | C | -9.5252  | 1.2345  | 0.0149  |
| 46 | F | -8.2693  | -2.1585 | -0.1505 |
| 47 | F | -10.8856 | -2.6368 | 0.0295  |
| 48 | F | -12.6699 | -0.5723 | 0.1992  |
| 49 | F | -11.7503 | 1.9976  | 0.1936  |
| 50 | F | -9.1499  | 2.5159  | 0.0320  |

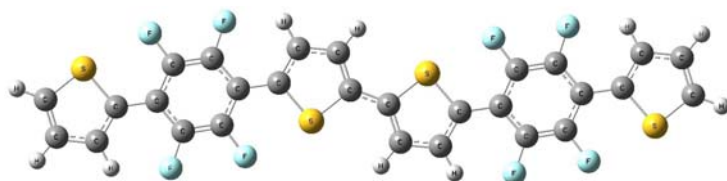

#### 4. TFFTFT

|   |         |         |          |
|---|---------|---------|----------|
| S | -0.8223 | 0.0604  | 2.0454   |
| S | 0.9713  | -0.0544 | 10.1415  |
| F | 2.6215  | 0.0499  | 5.1708   |
| F | 2.2256  | 0.0496  | 7.7273   |
| F | -2.4749 | -0.0190 | 7.0116   |
| F | -2.0792 | -0.0195 | 4.4548   |
| C | 0.2541  | -0.0152 | 0.6756   |
| C | 1.5724  | -0.0907 | 1.0997   |
| H | 2.4195  | -0.1518 | 0.4122   |
| C | 1.7153  | -0.0884 | 2.5046   |
| H | 2.6818  | -0.1464 | 3.0000   |
| C | 0.5087  | -0.0117 | 3.1938   |
| C | 0.2910  | 0.0091  | 4.6399   |
| C | 1.3474  | 0.0299  | 5.5766   |
| C | 1.1357  | 0.0329  | 6.9515   |
| C | -0.1446 | 0.0152  | 7.5433   |
| C | -1.2007 | 0.0025  | 6.6069   |
| C | -0.9896 | -0.0025 | 5.2318   |
| C | -0.3615 | 0.0114  | 8.9926   |
| C | -1.5681 | 0.0474  | 9.6821   |
| H | -2.5362 | 0.0927  | 9.1881   |
| C | -1.4192 | 0.0208  | 11.0945  |
| H | -2.2599 | 0.0435  | 11.7919  |
| C | -0.1032 | -0.0357 | 11.4854  |
| H | 0.2982  | -0.0653 | 12.4996  |
| S | 0.8151  | -0.0205 | -2.0447  |
| S | -0.9614 | 0.0421  | -10.1444 |
| F | -2.6249 | -0.0370 | -5.1780  |
| F | -2.2219 | -0.0393 | -7.7332  |
| F | 2.4766  | 0.0252  | -7.0044  |
| F | 2.0741  | 0.0248  | -4.4496  |
| C | -0.2647 | -0.0019 | -0.6759  |
| C | -1.5846 | 0.0239  | -1.1010  |
| H | -2.4343 | 0.0384  | -0.4141  |
| C | -1.7260 | 0.0262  | -2.5060  |
| H | -2.6938 | 0.0444  | -3.0019  |
| C | -0.5167 | 0.0017  | -3.1946  |
| C | -0.2959 | -0.0057 | -4.6402  |
| C | -1.3497 | -0.0205 | -5.5800  |
| C | -1.1342 | -0.0244 | -6.9544  |
| C | 0.1477  | -0.0082 | -7.5429  |
| C | 1.2011  | 0.0049  | -6.6035  |
| C | 0.9862  | 0.0089  | -5.2291  |
| C | 0.3687  | -0.0073 | -8.9914  |
| C | 1.5775  | -0.0373 | -9.6775  |
| H | 2.5445  | -0.0719 | -9.1806  |
| C | 1.4323  | -0.0197 | -11.0903 |
| H | 2.2752  | -0.0393 | -11.7853 |
| C | 0.1171  | 0.0239  | -11.4852 |
| H | -0.2818 | 0.0448  | -12.5007 |

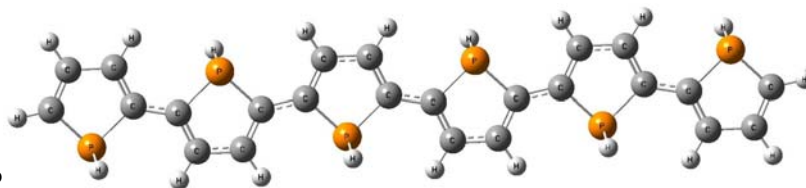

## 5. 6-1H-P

|    |   |         |         |          |
|----|---|---------|---------|----------|
| 1  | C | 0.1137  | 0.0482  | -11.3877 |
| 2  | P | -1.1659 | -0.0796 | -10.1040 |
| 3  | C | 0.1256  | 0.0033  | -8.7858  |
| 4  | C | -0.1543 | 0.0153  | -7.3706  |
| 5  | C | -1.3954 | 0.0510  | -6.7725  |
| 6  | C | -1.3945 | 0.0490  | -5.3375  |
| 7  | C | -0.1500 | 0.0117  | -4.7419  |
| 8  | C | 0.1324  | -0.0050 | -3.3335  |
| 9  | C | 1.3782  | -0.0403 | -2.7379  |
| 10 | C | 1.3814  | -0.0415 | -1.3056  |
| 11 | C | 0.1379  | -0.0069 | -0.7043  |
| 12 | C | -0.1379 | 0.0069  | 0.7043   |
| 13 | C | -1.3814 | 0.0415  | 1.3056   |
| 14 | C | -1.3782 | 0.0403  | 2.7379   |
| 15 | C | -0.1324 | 0.0050  | 3.3335   |
| 16 | C | 0.1500  | -0.0117 | 4.7419   |
| 17 | P | -1.1402 | -0.1330 | 6.0595   |
| 18 | C | 0.1543  | -0.0153 | 7.3706   |
| 19 | C | 1.3954  | -0.0510 | 6.7725   |
| 20 | C | 1.3945  | -0.0490 | 5.3375   |
| 21 | C | 1.3531  | -0.0458 | -10.8306 |
| 22 | C | 1.3641  | -0.0651 | -9.3818  |
| 23 | P | 1.1402  | 0.1330  | -6.0595  |
| 24 | P | -1.1581 | -0.1242 | -2.0165  |
| 25 | P | 1.1581  | 0.1242  | 2.0165   |
| 26 | H | 1.5731  | -1.2326 | -6.0624  |
| 27 | H | -2.3302 | 0.0708  | -7.3444  |
| 28 | H | -2.3279 | 0.0693  | -4.7634  |
| 29 | H | -1.5873 | 1.2426  | -2.0147  |
| 30 | H | 2.3106  | -0.0597 | -3.3135  |
| 31 | H | 2.3164  | -0.0619 | -0.7342  |
| 32 | H | -1.6312 | 1.2749  | -10.0680 |
| 33 | H | 2.2989  | -0.1258 | -8.8130  |
| 34 | H | 2.2784  | -0.1046 | -11.4146 |
| 35 | H | -0.0910 | 0.0603  | -12.4614 |
| 36 | H | 1.5873  | -1.2426 | 2.0147   |
| 37 | H | -2.3106 | 0.0597  | 3.3135   |
| 38 | H | -2.3164 | 0.0619  | 0.7342   |
| 39 | H | -1.5731 | 1.2326  | 6.0624   |
| 40 | H | 2.3279  | -0.0693 | 4.7634   |
| 41 | H | 2.3302  | -0.0708 | 7.3444   |
| 42 | C | -1.3641 | 0.0651  | 9.3818   |
| 43 | C | -1.3531 | 0.0458  | 10.8306  |
| 44 | C | -0.1256 | -0.0033 | 8.7858   |
| 45 | C | -0.1137 | -0.0482 | 11.3877  |
| 46 | P | 1.1659  | 0.0796  | 10.1040  |
| 47 | H | 1.6312  | -1.2749 | 10.0680  |
| 48 | H | -2.2989 | 0.1258  | 8.8130   |
| 49 | H | -2.2784 | 0.1046  | 11.4146  |
| 50 | H | 0.0910  | -0.0603 | 12.4614  |

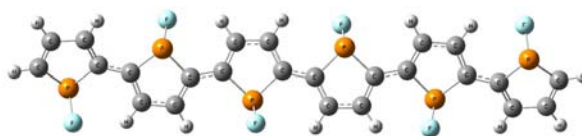

## 6. 6-1F-P

|    |   |          |         |         |
|----|---|----------|---------|---------|
| 1  | C | -7.3571  | -0.4267 | -0.0724 |
| 2  | C | -6.7110  | -1.6353 | -0.2210 |
| 3  | C | -5.2777  | -1.5788 | -0.2101 |
| 4  | C | -4.7326  | -0.3249 | -0.0377 |
| 5  | P | -6.0925  | 0.8659  | 0.2952  |
| 6  | C | -3.3329  | 0.0077  | 0.0008  |
| 7  | P | -1.9712  | -1.1923 | -0.3350 |
| 8  | C | -0.7096  | 0.1108  | 0.0127  |
| 9  | C | -1.3549  | 1.3184  | 0.1870  |
| 10 | C | -2.7862  | 1.2613  | 0.1809  |
| 11 | C | 0.7096   | -0.1108 | -0.0127 |
| 12 | P | 1.9712   | 1.1923  | 0.3350  |
| 13 | C | 3.3329   | -0.0077 | -0.0008 |
| 14 | C | 4.7326   | 0.3249  | 0.0377  |
| 15 | P | 6.0925   | -0.8659 | -0.2952 |
| 16 | C | 7.3571   | 0.4267  | 0.0724  |
| 17 | C | 6.7110   | 1.6353  | 0.2210  |
| 18 | C | 5.2777   | 1.5788  | 0.2101  |
| 19 | C | 2.7862   | -1.2613 | -0.1809 |
| 20 | C | 1.3549   | -1.3184 | -0.1870 |
| 21 | H | -1.9504  | -1.8578 | 0.9290  |
| 22 | H | -3.3943  | 2.1603  | 0.3195  |
| 23 | H | -0.8198  | 2.2620  | 0.3293  |
| 24 | H | 1.9504   | 1.8578  | -0.9290 |
| 25 | H | 0.8198   | -2.2620 | -0.3293 |
| 26 | H | 3.3943   | -2.1603 | -0.3195 |
| 27 | H | -6.0759  | 1.5882  | -0.9325 |
| 28 | H | -4.6740  | -2.4822 | -0.3366 |
| 29 | H | -7.2333  | -2.5829 | -0.3428 |
| 30 | C | -8.8036  | -0.2016 | -0.0394 |
| 31 | H | 6.0759   | -1.5882 | 0.9325  |
| 32 | C | 8.8036   | 0.2016  | 0.0394  |
| 33 | H | 7.2333   | 2.5829  | 0.3428  |
| 34 | H | 4.6740   | 2.4822  | 0.3366  |
| 35 | C | -9.7590  | -1.2405 | 0.0533  |
| 36 | C | -11.1331 | -1.0034 | 0.0749  |
| 37 | C | -11.6213 | 0.3035  | 0.0084  |
| 38 | C | -10.7163 | 1.3625  | -0.0785 |
| 39 | C | -9.3478  | 1.0999  | -0.1060 |
| 40 | F | -9.3744  | -2.5171 | 0.1375  |
| 41 | F | -11.9832 | -2.0215 | 0.1664  |
| 42 | F | -12.9277 | 0.5341  | 0.0295  |
| 43 | F | -11.1600 | 2.6136  | -0.1460 |
| 44 | F | -8.5302  | 2.1550  | -0.2013 |
| 45 | C | 9.3478   | -1.0999 | 0.1060  |
| 46 | C | 10.7163  | -1.3625 | 0.0785  |
| 47 | C | 11.6213  | -0.3035 | -0.0084 |
| 48 | C | 11.1331  | 1.0034  | -0.0749 |
| 49 | C | 9.7590   | 1.2405  | -0.0533 |
| 50 | F | 8.5302   | -2.1550 | 0.2013  |
| 51 | F | 11.1600  | -2.6136 | 0.1460  |
| 52 | F | 12.9277  | -0.5341 | -0.0295 |
| 53 | F | 11.9832  | 2.0215  | -0.1664 |
| 54 | F | 9.3744   | 2.5171  | -0.1375 |

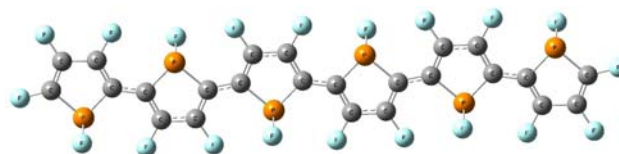

## 7. PF-6P

|    |   |          |         |         |
|----|---|----------|---------|---------|
| 1  | P | -10.3352 | -1.0341 | -0.2622 |
| 2  | C | -11.7145 | 0.1005  | 0.0172  |
| 3  | C | -11.2620 | 1.3833  | 0.0817  |
| 4  | C | -9.8199  | 1.5139  | 0.0859  |
| 5  | C | -9.1228  | 0.3270  | 0.0270  |
| 6  | H | -10.2972 | -1.7342 | 0.9823  |
| 7  | H | -12.7679 | -0.1907 | -0.0115 |
| 8  | H | -11.9146 | 2.2621  | 0.1233  |
| 9  | H | -9.3428  | 2.4931  | 0.1311  |
| 10 | C | -7.6687  | 0.1595  | 0.0234  |
| 11 | C | -6.7441  | 1.2265  | -0.0155 |
| 12 | C | -5.3683  | 1.0263  | -0.0072 |
| 13 | C | -4.7620  | -0.2483 | 0.0375  |
| 14 | C | -5.6877  | -1.3155 | 0.0785  |
| 15 | C | -7.0633  | -1.1145 | 0.0703  |
| 16 | F | -7.1654  | 2.4946  | -0.0746 |
| 17 | F | -4.5948  | 2.1201  | -0.0593 |
| 18 | F | -5.2658  | -2.5836 | 0.1363  |
| 19 | F | -7.8370  | -2.2080 | 0.1181  |
| 20 | C | -3.3115  | -0.4159 | 0.0230  |
| 21 | P | -2.0989  | 0.9490  | 0.2929  |
| 22 | C | -0.6936  | -0.1978 | 0.0049  |
| 23 | C | -1.1837  | -1.4838 | -0.0697 |
| 24 | C | -2.6134  | -1.6051 | -0.0535 |
| 25 | H | -2.1391  | 1.5990  | -0.9784 |
| 26 | H | -0.5417  | -2.3686 | -0.1451 |
| 27 | H | -3.0938  | -2.5823 | -0.1036 |
| 28 | C | 0.6936   | 0.1978  | -0.0049 |
| 29 | C | 1.1837   | 1.4838  | 0.0697  |
| 30 | C | 2.6134   | 1.6051  | 0.0535  |
| 31 | C | 3.3115   | 0.4159  | -0.0230 |
| 32 | P | 2.0989   | -0.9490 | -0.2929 |
| 33 | H | 0.5417   | 2.3686  | 0.1451  |
| 34 | H | 3.0938   | 2.5823  | 0.1036  |
| 35 | H | 2.1391   | -1.5990 | 0.9784  |
| 36 | C | 4.7620   | 0.2483  | -0.0375 |
| 37 | C | 5.6877   | 1.3155  | -0.0785 |
| 38 | C | 7.0633   | 1.1145  | -0.0703 |
| 39 | C | 7.6687   | -0.1595 | -0.0234 |
| 40 | C | 6.7441   | -1.2265 | 0.0155  |
| 41 | C | 5.3683   | -1.0263 | 0.0072  |
| 42 | F | 5.2658   | 2.5836  | -0.1363 |
| 43 | F | 7.8370   | 2.2080  | -0.1181 |
| 44 | F | 7.1654   | -2.4946 | 0.0746  |
| 45 | F | 4.5948   | -2.1201 | 0.0593  |
| 46 | C | 9.1228   | -0.3270 | -0.0270 |
| 47 | P | 10.3352  | 1.0341  | 0.2622  |
| 48 | C | 11.7145  | -0.1005 | -0.0172 |
| 49 | C | 11.2620  | -1.3833 | -0.0817 |
| 50 | C | 9.8199   | -1.5139 | -0.0859 |
| 51 | H | 10.2972  | 1.7342  | -0.9823 |
| 52 | H | 12.7679  | 0.1907  | 0.0115  |
| 53 | H | 11.9146  | -2.2621 | -0.1233 |
| 54 | H | 9.3428   | -2.4931 | -0.1311 |



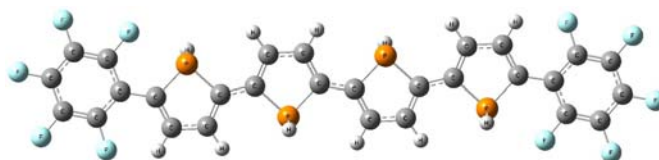

## 8. 1H-FPPPPF

|    |   |         |         |          |
|----|---|---------|---------|----------|
| 1  | C | 0.2841  | 0.0426  | -11.3433 |
| 2  | C | 1.5057  | 0.2129  | -10.7710 |
| 3  | C | 1.5139  | 0.1873  | -9.3112  |
| 4  | C | 0.2849  | -0.0245 | -8.7396  |
| 5  | C | -0.0355 | -0.0321 | -7.3409  |
| 6  | P | 1.1210  | 0.5287  | -6.0150  |
| 7  | C | -0.0786 | -0.0180 | -4.7185  |
| 8  | C | 0.1984  | -0.0119 | -3.3174  |
| 9  | P | -1.0013 | -0.5595 | -2.0224  |
| 10 | C | 0.1595  | -0.0027 | -0.6954  |
| 11 | C | -0.1595 | 0.0027  | 0.6954   |
| 12 | P | 1.0013  | 0.5595  | 2.0224   |
| 13 | C | -0.1984 | 0.0119  | 3.3174   |
| 14 | C | 0.0786  | 0.0180  | 4.7185   |
| 15 | C | 1.2972  | 0.2318  | 5.3282   |
| 16 | C | 1.2715  | 0.2404  | 6.7705   |
| 17 | C | 0.0355  | 0.0321  | 7.3409   |
| 18 | C | -0.2849 | 0.0245  | 8.7396   |
| 19 | P | 0.8964  | 0.5173  | 10.0792  |
| 20 | C | -0.2841 | -0.0426 | 11.3433  |
| 21 | C | -1.5057 | -0.2129 | 10.7710  |
| 22 | C | -1.5139 | -0.1873 | 9.3112   |
| 23 | P | -0.8964 | -0.5173 | -10.0792 |
| 24 | C | -1.2715 | -0.2404 | -6.7705  |
| 25 | C | -1.2972 | -0.2318 | -5.3282  |
| 26 | C | 1.4190  | 0.2027  | -2.7083  |
| 27 | C | 1.3981  | 0.2075  | -1.2697  |
| 28 | C | -1.3981 | -0.2075 | 1.2697   |
| 29 | C | -1.4190 | -0.2027 | 2.7083   |
| 30 | P | -1.1210 | -0.5287 | 6.0150   |
| 31 | F | 2.2840  | -0.6280 | -5.9861  |
| 32 | H | -2.1821 | -0.4017 | -7.3577  |
| 33 | H | -2.2278 | -0.3855 | -4.7710  |
| 34 | F | -2.1586 | 0.6031  | -2.0428  |
| 35 | H | 2.3474  | 0.3593  | -3.2684  |
| 36 | H | 2.3097  | 0.3671  | -0.6837  |
| 37 | F | -2.0593 | 0.6323  | -9.9846  |
| 38 | H | 2.4358  | 0.3275  | -8.7365  |
| 39 | H | 2.4315  | 0.3475  | -11.3423 |
| 40 | H | 0.1023  | -0.0076 | -12.4201 |
| 41 | F | 2.1586  | -0.6031 | 2.0428   |
| 42 | H | -2.3474 | -0.3593 | 3.2684   |
| 43 | H | -2.3097 | -0.3671 | 0.6837   |
| 44 | F | -2.2840 | 0.6280  | 5.9861   |
| 45 | H | 2.2278  | 0.3855  | 4.7710   |
| 46 | H | 2.1821  | 0.4017  | 7.3577   |
| 47 | F | 2.0593  | -0.6323 | 9.9846   |
| 48 | H | -2.4358 | -0.3275 | 8.7365   |
| 49 | H | -2.4315 | -0.3475 | 11.3423  |
| 50 | H | -0.1023 | 0.0076  | 12.4201  |

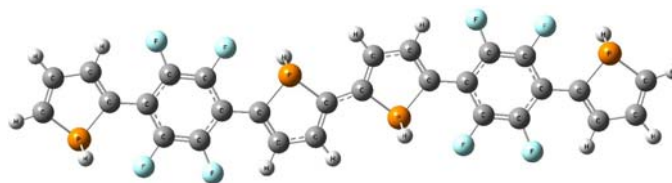

### 9. 1F-FPPPPF

|    |   |         |         |          |
|----|---|---------|---------|----------|
| 1  | C | -0.0338 | -0.1080 | -11.4222 |
| 2  | C | 1.2073  | 0.0104  | -10.9028 |
| 3  | C | 1.2127  | 0.0641  | -9.4402  |
| 4  | C | 0.0065  | -0.0370 | -8.8173  |
| 5  | C | -0.2427 | 0.0193  | -7.4058  |
| 6  | P | 1.0245  | 0.4278  | -6.1058  |
| 7  | C | -0.2045 | 0.0678  | -4.7561  |
| 8  | C | 0.0801  | 0.0619  | -3.3546  |
| 9  | P | -1.1478 | -0.3482 | -2.0172  |
| 10 | C | 0.1209  | 0.0130  | -0.7042  |
| 11 | C | -0.1209 | -0.0130 | 0.7042   |
| 12 | P | 1.1478  | 0.3482  | 2.0172   |
| 13 | C | -0.0801 | -0.0619 | 3.3546   |
| 14 | C | 0.2045  | -0.0678 | 4.7561   |
| 15 | C | 1.4342  | 0.0511  | 5.3389   |
| 16 | C | 1.4536  | 0.0801  | 6.7857   |
| 17 | C | 0.2427  | -0.0193 | 7.4058   |
| 18 | C | -0.0065 | 0.0370  | 8.8173   |
| 19 | P | 1.2818  | 0.4446  | 10.1026  |
| 20 | C | 0.0338  | 0.1080  | 11.4222  |
| 21 | C | -1.2073 | -0.0104 | 10.9028  |
| 22 | C | -1.2127 | -0.0641 | 9.4402   |
| 23 | P | -1.2818 | -0.4446 | -10.1026 |
| 24 | C | -1.4536 | -0.0801 | -6.7857  |
| 25 | C | -1.4342 | -0.0511 | -5.3389  |
| 26 | C | 1.3090  | 0.1817  | -2.7686  |
| 27 | C | 1.3313  | 0.1561  | -1.3237  |
| 28 | C | -1.3313 | -0.1561 | 1.3237   |
| 29 | C | -1.3090 | -0.1817 | 2.7686   |
| 30 | P | -1.0245 | -0.4278 | 6.1058   |
| 31 | F | 1.9226  | -0.9298 | -6.0968  |
| 32 | F | -2.0458 | 1.0090  | -1.9759  |
| 33 | F | -2.1707 | 0.9177  | -10.1253 |
| 34 | F | 2.0458  | -1.0090 | 1.9759   |
| 35 | F | -1.9226 | 0.9298  | 6.0968   |
| 36 | F | 2.1707  | -0.9177 | 10.1253  |
| 37 | F | 0.3119  | 0.2187  | 12.7146  |
| 38 | F | -2.3472 | -0.0571 | 11.5716  |
| 39 | F | -2.3792 | -0.2118 | 8.8241   |
| 40 | F | 2.6210  | 0.2092  | 7.4116   |
| 41 | F | 2.5829  | 0.1507  | 4.6781   |
| 42 | F | -2.4554 | -0.3152 | 3.4285   |
| 43 | F | -2.4972 | -0.2714 | 0.6958   |
| 44 | F | 2.4972  | 0.2714  | -0.6958  |
| 45 | F | 2.4554  | 0.3152  | -3.4285  |
| 46 | F | -2.5829 | -0.1507 | -4.6781  |
| 47 | F | -2.6210 | -0.2092 | -7.4116  |
| 48 | F | -0.3119 | -0.2187 | -12.7146 |
| 49 | F | 2.3472  | 0.0571  | -11.5716 |
| 50 | F | 2.3792  | 0.2118  | -8.8241  |

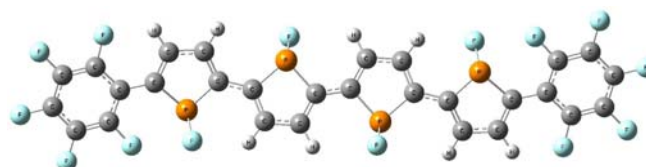

### 10. 1H-PFPPFP

|    |   |          |         |         |
|----|---|----------|---------|---------|
| 1  | C | 9.7240   | -0.1336 | 1.3369  |
| 2  | C | 8.7754   | 0.0076  | 0.2964  |
| 3  | C | 9.3248   | 0.0665  | -1.0043 |
| 4  | C | 10.6936  | 0.0107  | -1.2610 |
| 5  | C | 11.5905  | -0.1311 | -0.2010 |
| 6  | C | 11.0967  | -0.2010 | 1.1039  |
| 7  | C | 7.3303   | 0.0445  | 0.5165  |
| 8  | C | 6.6713   | 0.0632  | 1.7247  |
| 9  | C | 5.2290   | 0.0712  | 1.6577  |
| 10 | C | 4.7037   | 0.0668  | 0.3880  |
| 11 | P | 6.0747   | 0.4007  | -0.7954 |
| 12 | F | 8.5164   | 0.1947  | -2.0601 |
| 13 | F | 11.1439  | 0.0810  | -2.5084 |
| 14 | F | 12.8952  | -0.1930 | -0.4278 |
| 15 | F | 11.9394  | -0.3333 | 2.1227  |
| 16 | F | 9.3326   | -0.2094 | 2.6119  |
| 17 | C | 3.3212   | 0.0078  | 0.0215  |
| 18 | C | 2.7961   | 0.0013  | -1.2526 |
| 19 | C | 1.3576   | -0.0137 | -1.3267 |
| 20 | C | 0.7053   | -0.0196 | -0.1118 |
| 21 | P | 1.9542   | -0.3556 | 1.2079  |
| 22 | C | -0.7053  | 0.0196  | 0.1118  |
| 23 | C | -1.3576  | 0.0137  | 1.3267  |
| 24 | C | -2.7961  | -0.0013 | 1.2526  |
| 25 | C | -3.3212  | -0.0078 | -0.0215 |
| 26 | P | -1.9542  | 0.3556  | -1.2079 |
| 27 | C | -4.7037  | -0.0668 | -0.3880 |
| 28 | P | -6.0747  | -0.4007 | 0.7954  |
| 29 | C | -7.3303  | -0.0445 | -0.5165 |
| 30 | C | -8.7754  | -0.0076 | -0.2964 |
| 31 | C | -9.7240  | 0.1336  | -1.3369 |
| 32 | C | -11.0967 | 0.2010  | -1.1039 |
| 33 | C | -11.5905 | 0.1311  | 0.2010  |
| 34 | C | -10.6936 | -0.0107 | 1.2610  |
| 35 | C | -9.3248  | -0.0665 | 1.0043  |
| 36 | F | -9.3326  | 0.2094  | -2.6119 |
| 37 | F | -11.9394 | 0.3333  | -2.1227 |
| 38 | F | -12.8952 | 0.1930  | 0.4278  |
| 39 | F | -11.1439 | -0.0810 | 2.5084  |
| 40 | F | -8.5164  | -0.1947 | 2.0601  |
| 41 | C | -6.6713  | -0.0632 | -1.7247 |
| 42 | C | -5.2290  | -0.0712 | -1.6577 |
| 43 | F | -1.8885  | -0.9784 | -2.1587 |
| 44 | H | -3.4155  | -0.0064 | 2.1538  |
| 45 | H | -0.8340  | 0.0193  | 2.2870  |
| 46 | F | 1.8885   | 0.9784  | 2.1587  |
| 47 | H | 0.8340   | -0.0193 | -2.2870 |
| 48 | H | 3.4155   | 0.0064  | -2.1538 |
| 49 | F | -6.0260  | 0.9223  | 1.7540  |
| 50 | H | -4.6193  | -0.0803 | -2.5655 |
| 51 | H | -7.1802  | -0.0824 | -2.6872 |
| 52 | F | 6.0260   | -0.9223 | -1.7540 |
| 53 | H | 7.1802   | 0.0824  | 2.6872  |
| 54 | H | 4.6193   | 0.0803  | 2.5655  |

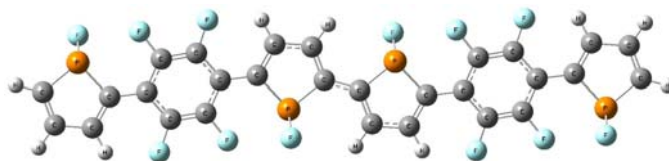

### 11. 1F-PFPPFP

|    |   |          |         |         |
|----|---|----------|---------|---------|
| 1  | C | 5.3370   | 1.1019  | 0.1290  |
| 2  | C | 4.7577   | -0.1828 | 0.0262  |
| 3  | C | 5.6987   | -1.2244 | -0.1398 |
| 4  | C | 7.0694   | -0.9965 | -0.1848 |
| 5  | C | 7.6468   | 0.2882  | -0.0846 |
| 6  | C | 6.7070   | 1.3297  | 0.0829  |
| 7  | C | 3.3134   | -0.3798 | 0.0440  |
| 8  | P | 2.0773   | 0.9472  | 0.4154  |
| 9  | C | 0.6889   | -0.1990 | 0.0304  |
| 10 | C | 1.1888   | -1.4786 | 0.0086  |
| 11 | C | 2.6308   | -1.5764 | 0.0198  |
| 12 | F | 5.2930   | -2.4927 | -0.2572 |
| 13 | F | 7.8594   | -2.0650 | -0.3391 |
| 14 | C | 9.0925   | 0.4956  | -0.1063 |
| 15 | C | 9.7611   | 1.6919  | -0.1636 |
| 16 | C | 11.2176  | 1.5907  | -0.1130 |
| 17 | C | 11.6976  | 0.3265  | -0.0050 |
| 18 | P | 10.3531  | -0.8482 | -0.3232 |
| 19 | F | 7.1128   | 2.5976  | 0.2025  |
| 20 | F | 4.5460   | 2.1699  | 0.2872  |
| 21 | C | -0.6889  | 0.1990  | -0.0304 |
| 22 | C | -1.1888  | 1.4786  | -0.0086 |
| 23 | C | -2.6308  | 1.5764  | -0.0198 |
| 24 | C | -3.3134  | 0.3798  | -0.0440 |
| 25 | P | -2.0773  | -0.9472 | -0.4154 |
| 26 | C | -4.7577  | 0.1828  | -0.0262 |
| 27 | C | -5.3370  | -1.1019 | -0.1290 |
| 28 | C | -6.7070  | -1.3297 | -0.0829 |
| 29 | C | -7.6468  | -0.2882 | 0.0846  |
| 30 | C | -7.0694  | 0.9965  | 0.1848  |
| 31 | C | -5.6987  | 1.2244  | 0.1398  |
| 32 | C | -9.0925  | -0.4956 | 0.1063  |
| 33 | C | -9.7611  | -1.6919 | 0.1636  |
| 34 | C | -11.2176 | -1.5907 | 0.1130  |
| 35 | C | -11.6976 | -0.3265 | 0.0050  |
| 36 | P | -10.3531 | 0.8482  | 0.3232  |
| 37 | F | -7.1128  | -2.5976 | -0.2025 |
| 38 | F | -4.5460  | -2.1699 | -0.2872 |
| 39 | F | -5.2930  | 2.4927  | 0.2572  |
| 40 | F | -7.8594  | 2.0650  | 0.3391  |
| 41 | F | -10.2532 | 1.7499  | -1.0313 |
| 42 | H | -12.7567 | -0.0563 | -0.0162 |
| 43 | H | -11.8466 | -2.4860 | 0.1725  |
| 44 | H | -9.2716  | -2.6622 | 0.2565  |
| 45 | F | -2.0729  | -1.9356 | 0.8864  |
| 46 | H | -0.5610  | 2.3756  | 0.0171  |
| 47 | H | -3.1200  | 2.5512  | -0.0177 |
| 48 | H | 0.5610   | -2.3756 | -0.0171 |
| 49 | H | 3.1200   | -2.5512 | 0.0177  |
| 50 | F | 2.0729   | 1.9356  | -0.8864 |
| 51 | F | 10.2532  | -1.7499 | 1.0313  |
| 52 | H | 12.7567  | 0.0563  | 0.0162  |
| 53 | H | 11.8466  | 2.4860  | -0.1725 |
| 54 | H | 9.2716   | 2.6622  | -0.2565 |

**Figure 1S.** DFT//B3LYP/3-21G(d) Raman profiles (un-scaled, in  $\text{cm}^{-1}$ ) of oligomers

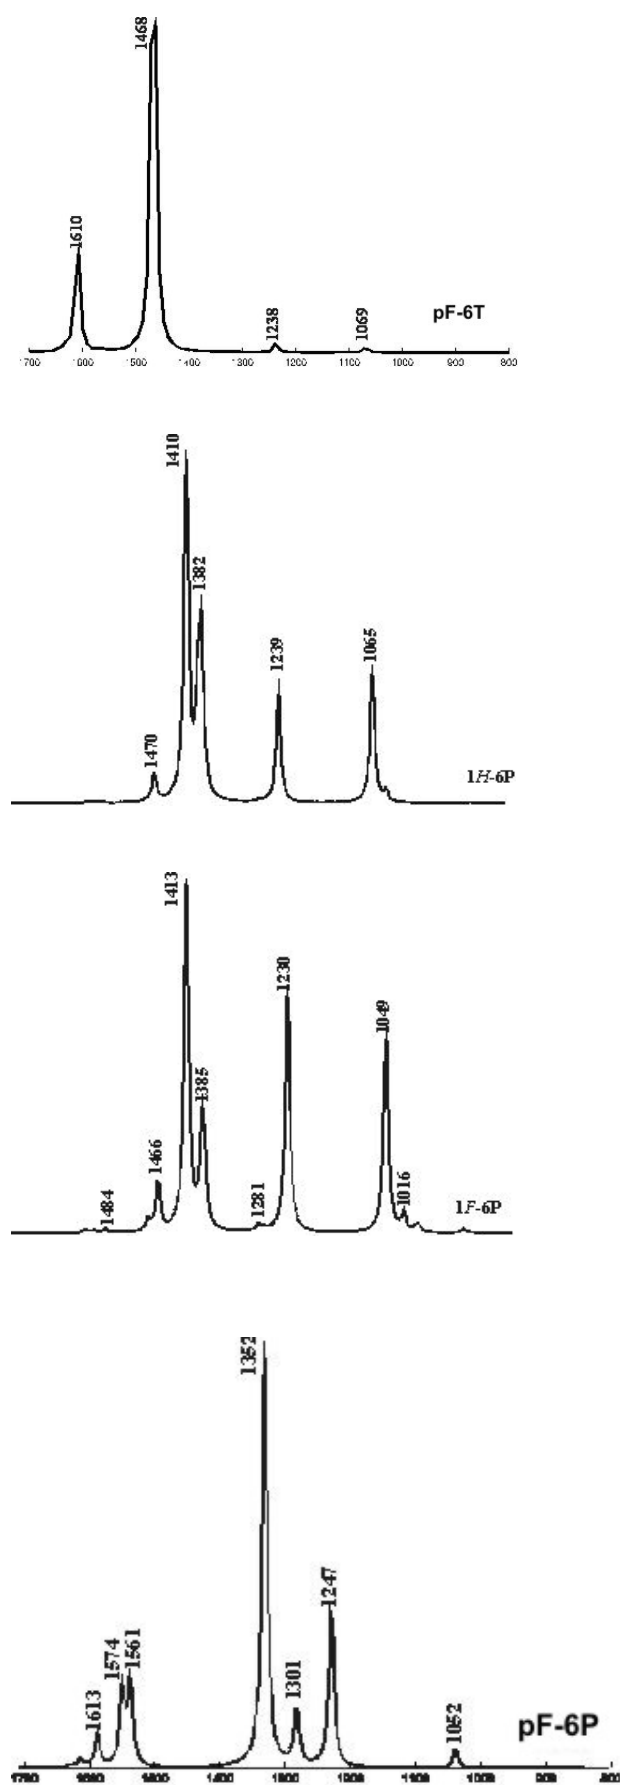

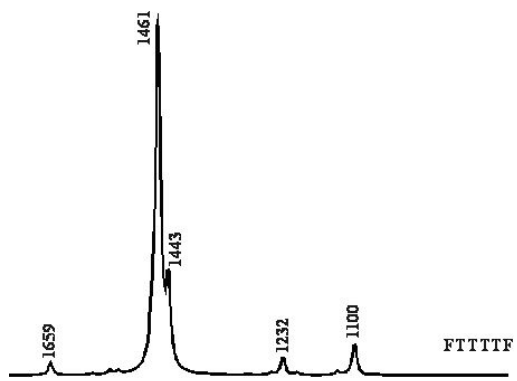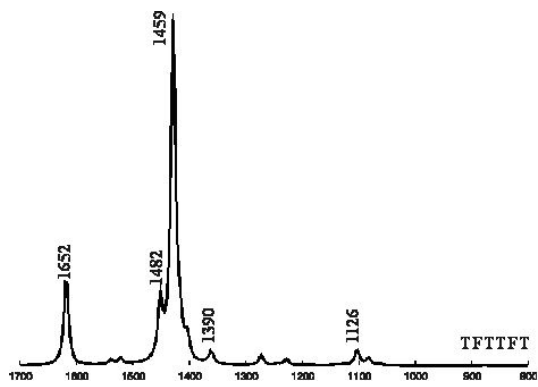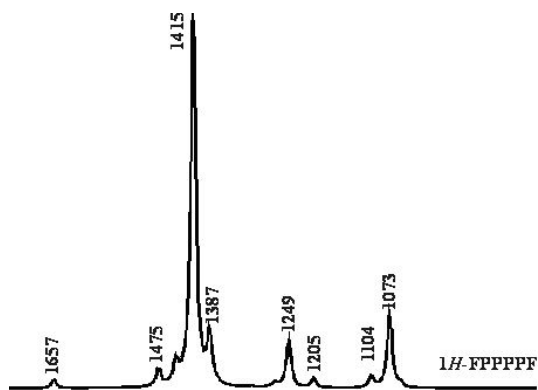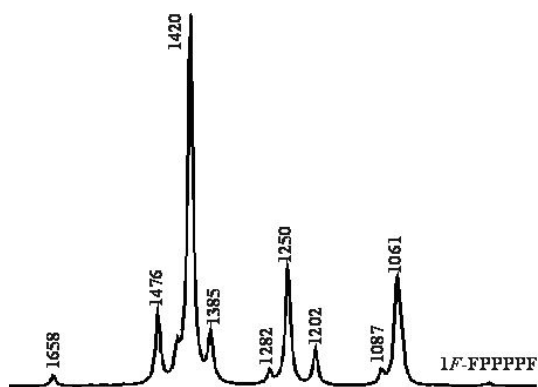

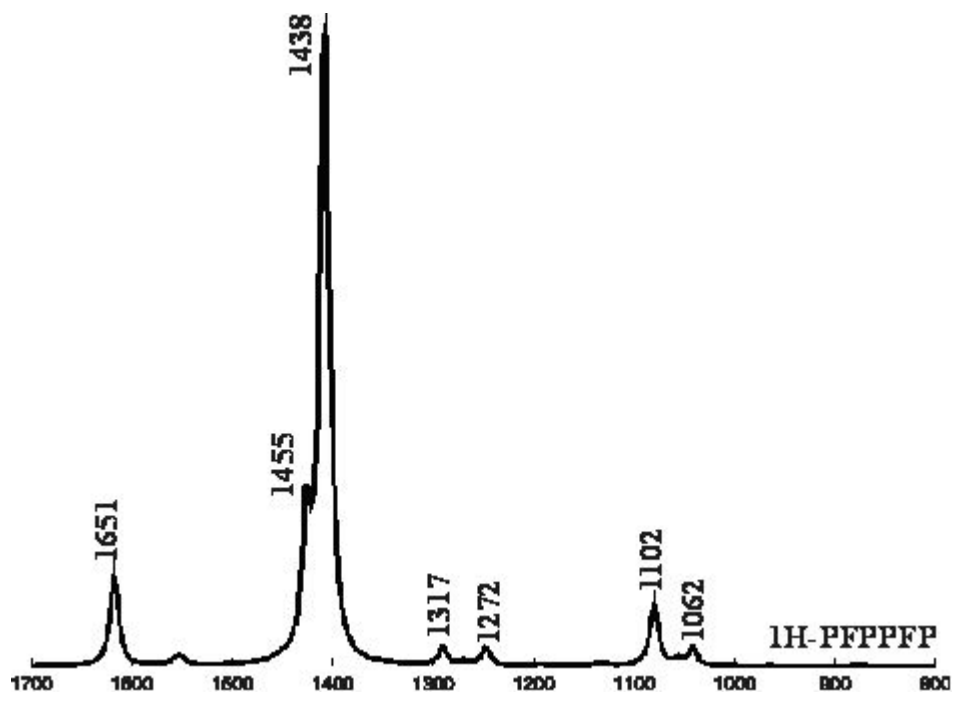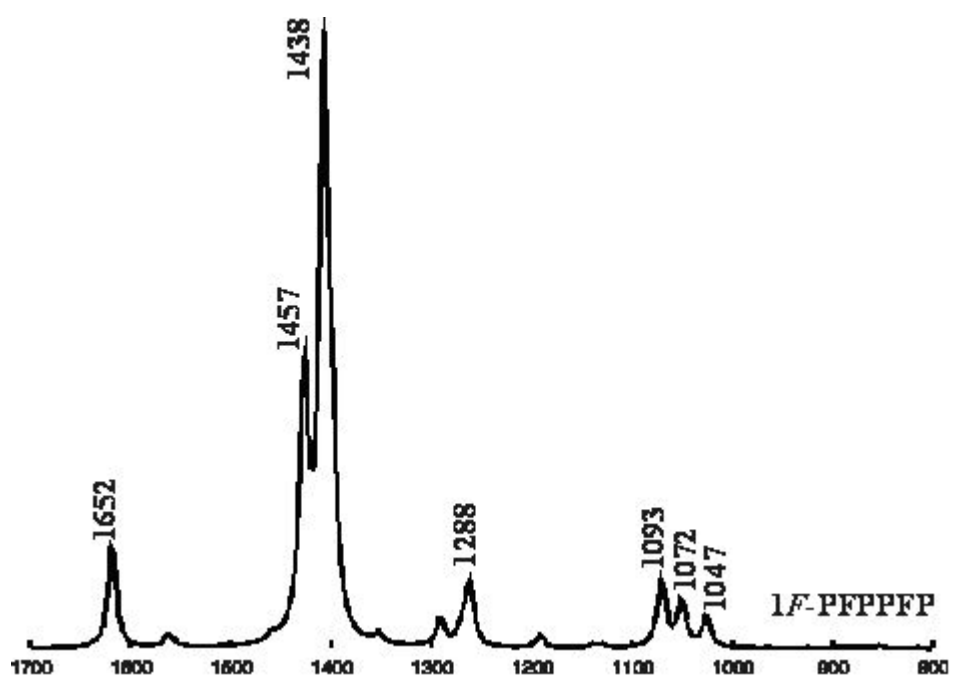

Supplement: mmc1 [file mmc1.pdf]
